# Supplementary material
Source: HighWire-hosted journal article supplement (https://hw-f5-jim.highwire.org/content/70/6/1387)
Supplement: inline-supplementary-material-1 [file inline-supplementary-material-1.pdf]

**Supplemental Figure 1.** Screening and stratification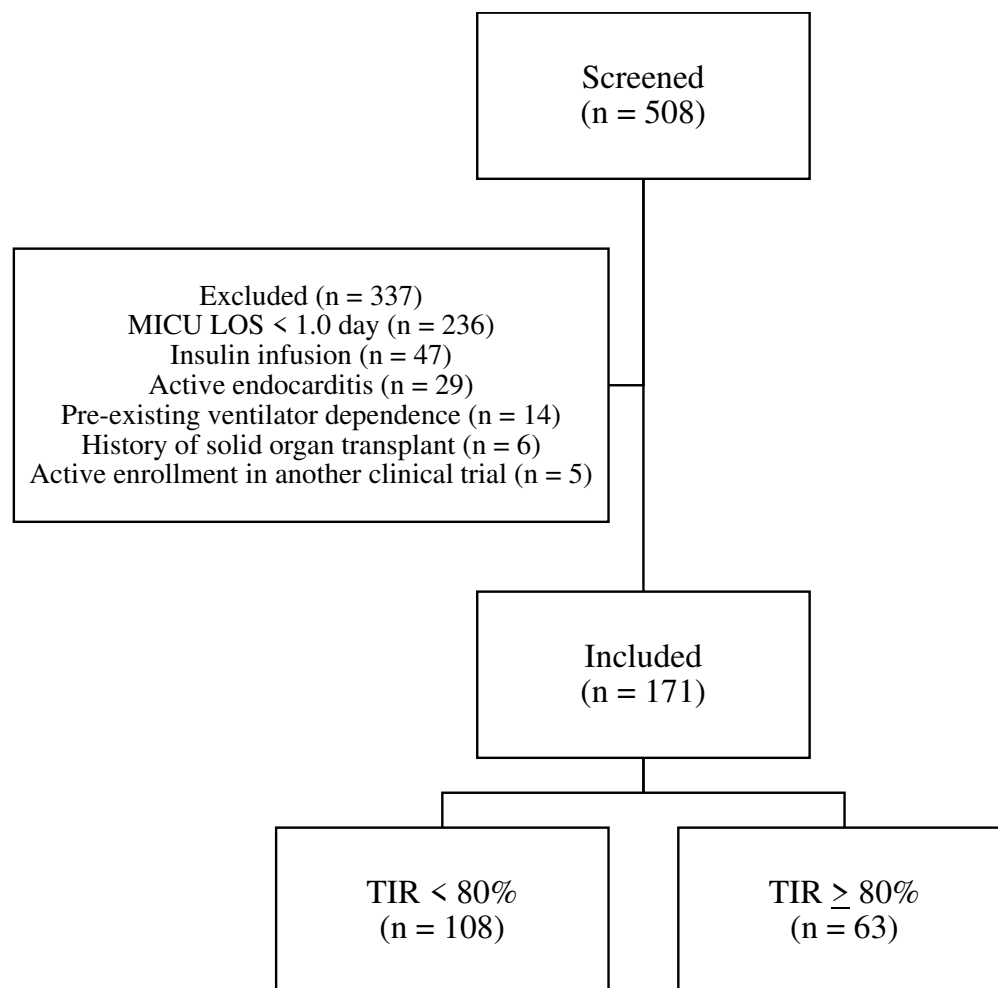

LOS = Length of stay, MICU = Medical intensive care unit, TIR = Time in targeted blood glucose range
